# Supplementary material for: Erfassung der Lebendigkeit mentaler Vorstellungsbilder
Source: Atypon-hosted journal article supplement (doi:10.1026/0012-1924/a000291), 2022-05-13
Supplement: 0012-1924_a000291_esm2.pdf [file 0012-1924_a000291_esm2.pdf]

*Elektronisches Supplement 2.* Itemwortlaut und Faktorladungen des deutschsprachigen Plymouth Sensory Imagery Questionnaire (PSI-Q; 21 Item-Version) nach Exploratory Structural Equation Modeling (ESEM) mit schiefwinkliger Geomin-Rotation ( $N = 300$ ).

| Nr.                                                                | Instruktion zur Szene / Itemwortlaut              | PSI-Q Subskalen (7 Sinne) |               |               |               |               |               |               |
|--------------------------------------------------------------------|---------------------------------------------------|---------------------------|---------------|---------------|---------------|---------------|---------------|---------------|
|                                                                    |                                                   | visuell                   | auditiv       | olfaktor.     | gustator.     | tasten        | kinästhet.    | emotional     |
| I. Visuell: Stellen Sie sich das Aussehen / Erscheinung ...        |                                                   |                           |               |               |               |               |               |               |
| 1                                                                  | ... eines Lagerfeuers vor.                        | <b>.56***</b>             | .02           | .10           | .08           | .15           | .02           | -.04          |
| 2                                                                  | ... eines Sonnenuntergangs vor.                   | <b>.70***</b>             | .02           | .05           | -.05          | -.01          | .03           | .06           |
| 3                                                                  | ... einer Katze vor, die einen Baum hochklettert. | <b>.72***</b>             | .04           | -.05          | .04           | -.01          | < .01         | .03           |
| II. Auditiv: Stellen Sie sich den Klang und Geräusche ...          |                                                   |                           |               |               |               |               |               |               |
| 4                                                                  | ... der Hupe eines Autos vor.                     | < .01                     | <b>.70***</b> | .07           | .04           | -.02          | .02           | .05           |
| 5                                                                  | ... vom Hände-Klatschen beim Applaudieren vor.    | .28                       | <b>.58***</b> | .02           | -.04          | .19           | -.17          | .02           |
| 6                                                                  | ... der Sirene eines Krankenwagens vor.           | .01                       | <b>.81***</b> | .01           | .02           | < .01         | .10           | -.20          |
| III. Olfaktorisch: Stellen Sie sich den Geruch ...                 |                                                   |                           |               |               |               |               |               |               |
| 7                                                                  | ... von frisch gemähtem Gras vor.                 | .05                       | .05           | <b>.87***</b> | .01           | -.05          | .02           | .02           |
| 8                                                                  | ... von brennendem Holz vor.                      | .14                       | .03           | <b>.51***</b> | .15           | .10           | -.02          | .07           |
| 9                                                                  | ... einer Rose vor.                               | -.05                      | .01           | <b>.40**</b>  | .20           | .21           | .15           | -.14*         |
| IV. Gustatorisch: Stellen Sie sich den Geschmack ...               |                                                   |                           |               |               |               |               |               |               |
| 10                                                                 | ... von schwarzem Pfeffer vor.                    | .04                       | -.05          | .04           | <b>.86***</b> | -.09          | < .01         | -.04          |
| 11                                                                 | ... einer Zitrone vor.                            | .03                       | -.01          | .02           | <b>.76***</b> | .01           | .09           | .03           |
| 12                                                                 | ... von Senf vor.                                 | -.07                      | .03           | .05           | <b>.70***</b> | .09           | -.13          | .15           |
| V. Tasten: Stellen Sie sich die Wahrnehmung beim Tasten ...        |                                                   |                           |               |               |               |               |               |               |
| 13                                                                 | ... von Fell vor.                                 | .18                       | < .01         | < .01         | .10           | <b>.54</b>    | .14           | < .01         |
| 14                                                                 | ... von warmem Sand vor.                          | -.02                      | -.03          | .05           | -.03          | <b>.93***</b> | < .01         | .06           |
| 15                                                                 | ... eines weichen Handtuchs vor.                  | .09                       | .09           | -.15          | .26*          | <b>.37</b>    | .25           | < .01         |
| VI. Kinästhetisch: Stellen Sie sich die körperliche Empfindung ... |                                                   |                           |               |               |               |               |               |               |
| 16                                                                 | ... beim Entspannen in einem warmen Bad vor.      | .11                       | -.15          | .11           | < .01         | .06           | <b>.69**</b>  | < .01         |
| 17                                                                 | ... beim schnellen Gehen in der Kälte vor.        | -.08                      | .04           | .11           | -.04          | .03           | <b>.66***</b> | .15           |
| 18                                                                 | ... beim Sprung in einen Swimmingpool vor.        | .03                       | .13           | -.05          | .19           | .03           | <b>.43*</b>   | .05           |
| VII. Emotion: Stellen Sie sich vor, Sie fühlen sich emotional .... |                                                   |                           |               |               |               |               |               |               |
| 19                                                                 | ... aufgeregt.                                    | .09                       | -.05          | .18           | < .01         | .03           | .03           | <b>.69***</b> |
| 20                                                                 | ... erleichtert.                                  | < .01                     | .02           | < .01         | .02           | -.02          | .33           | <b>.54***</b> |
| 21                                                                 | ... verängstigt.                                  | < .01                     | .09           | -.04          | .12           | .03           | .04           | <b>.58***</b> |

*Anmerkungen:* Jeweilige Höchstladungen sind fett markiert. \*\*\*  $p \leq .001$ , \*\*  $p \leq .01$ , \*  $p \leq .05$ . Instruktion: „Bitte stellen Sie sich jedes mentale Bild mithilfe Ihrer Vorstellungskraft vor und beurteilen Sie anschließend jede mentale Vorstellung anhand der folgenden Skala: 0 = überhaupt nicht bis 10 = mentale Vorstellung so klar und lebhaft wie im realen Leben“.
