# Supplementary material for: Erfassung der Lebendigkeit mentaler Vorstellungsbilder
Source: Atypon-hosted journal article supplement (doi:10.1026/0012-1924/a000291), 2022-05-13
Supplement: 0012-1924_a000291_esm3.pdf [file 0012-1924_a000291_esm3.pdf]

|    |      |      |     |  |           |      |      |     |     |      |
|----|------|------|-----|--|-----------|------|------|-----|-----|------|
| 18 | 6.55 | 2.34 | .59 |  |           |      |      |     |     |      |
| 19 | 7.57 | 1.96 | .60 |  | emotional | 7.15 | 1.76 | .76 | .80 | .51* |
| 20 | 7.41 | 2.07 | .57 |  |           |      |      |     |     |      |
| 21 | 6.48 | 2.41 | .54 |  |           |      |      |     |     |      |

---

*Anmerkungen:*  $M$  = Mittelwert,  $SD$  = Standardabweichung,  $r_{it}$  = Trennschärfe,  $\omega$  = McDonalds Omega,  $r_{tt}$  = Retest-Korrelation. <sup>1</sup>Die Subskalen des VVIQ „Sonnenaufgang“ und „Landschaft“ basieren auf den Ergebnissen des Exploratory Structural Equation Modeling (ESEM). Range: VVIQ: 1–5, PSI-Q: 0–10.  $N = 300$ , zweiter Messzeitpunkt  $n = 22$ . \*\*\*  $p \leq .001$ , \*\*  $p \leq .01$ , \*  $p \leq .05$ .
