# Supplementary material for: Erfassung der Lebendigkeit mentaler Vorstellungsbilder
Source: Atypon-hosted journal article supplement (doi:10.1026/0012-1924/a000291), 2022-05-13
Supplement: 0012-1924_a000291_esm4.pdf [file 0012-1924_a000291_esm4.pdf]

Elektronisches Supplement 4. Produkt-Moment-Korrelationen zwischen den Skalen des VVIQ und des PSI-Q sowie mit dem VVQ, der SUIS und der TAS-20.

|                                 | 1      | 2      | 3      | 4      | 5      | 6      | 7      | 8      | 9      | 10     | 11     | 12     | 13     | 14      | 15     | 16     | 17   | 18 |
|---------------------------------|--------|--------|--------|--------|--------|--------|--------|--------|--------|--------|--------|--------|--------|---------|--------|--------|------|----|
| 1. VVIQ Gesamt                  | 1      |        |        |        |        |        |        |        |        |        |        |        |        |         |        |        |      |    |
| 2. VVIQ Person                  | .68*** | 1      |        |        |        |        |        |        |        |        |        |        |        |         |        |        |      |    |
| 3. VVIQ Sonne <sup>1</sup>      | .57*** | .25*** | 1      |        |        |        |        |        |        |        |        |        |        |         |        |        |      |    |
| 4. VVIQ Geschäft                | .75*** | .36*** | .27*** | 1      |        |        |        |        |        |        |        |        |        |         |        |        |      |    |
| 5. VVIQ Landschaft <sup>2</sup> | .85*** | .48*** | .36*** | .49*** | 1      |        |        |        |        |        |        |        |        |         |        |        |      |    |
| 6. PSI-Q Gesamt                 | .62*** | .44*** | .42*** | .35*** | .55*** | 1      |        |        |        |        |        |        |        |         |        |        |      |    |
| 7. PSI-Q visuell                | .51*** | .37*** | .43*** | .26*** | .43*** | .70*** | 1      |        |        |        |        |        |        |         |        |        |      |    |
| 8. PSI-Q auditiv                | .45*** | .26*** | .30*** | .28*** | .43*** | .64*** | .49*** | 1      |        |        |        |        |        |         |        |        |      |    |
| 9. PSI-Q olfaktor.              | .44*** | .33*** | .30*** | .24*** | .39*** | .80*** | .47*** | .46*** | 1      |        |        |        |        |         |        |        |      |    |
| 10. PSI-Q gustator.             | .35*** | .26*** | .25*** | .20*** | .28*** | .73*** | .37*** | .31*** | .59*** | 1      |        |        |        |         |        |        |      |    |
| 11. PSI-Q tasten                | .46*** | .35*** | .27*** | .30*** | .39*** | .80*** | .51*** | .41*** | .53*** | .52*** | 1      |        |        |         |        |        |      |    |
| 12. PSI-Q kinästhet.            | .46*** | .34*** | .26*** | .25*** | .41*** | .74*** | .40*** | .34*** | .51*** | .42*** | .64*** | 1      |        |         |        |        |      |    |
| 13. PSI-Q emotional             | .52*** | .35*** | .37*** | .27*** | .49*** | .69*** | .42*** | .31*** | .42*** | .39*** | .50*** | .53*** | 1      |         |        |        |      |    |
| 14. VVQ verbal                  | .10    | .11    | -.01   | .09    | .11    | .07    | -.03   | <.01   | <.01   | .06    | .12*   | .06    | .12*   | 1       |        |        |      |    |
| 15. VVQ visuell                 | .21*** | .07    | .10    | .19**  | .20*** | .14*   | .16**  | .16**  | .07    | .04    | .10    | .06    | .16**  | .07     | 1      |        |      |    |
| 16. VVQ Traum                   | .15**  | .07    | -.01   | .13*   | .22*** | .22*** | .16**  | .03    | .12*   | .11    | .30*** | .18**  | .25*** | -.27*** | .09    | 1      |      |    |
| 17. SUIS                        | .39*** | .29*** | .17**  | .27*** | .39*** | .44*** | .31*** | .23*** | .36*** | .23*** | .35*** | .39*** | .40*** | .02     | .28*** | .30*** | 1    |    |
| 18. TAS-20                      | -.17** | -.14*  | -.07   | -.15*  | -.13*  | -.15*  | -.12*  | -.10   | -.04   | -.15** | -.15** | -.06   | -.15*  | -.19**  | -.11   | .07    | -.08 | 1  |

Anmerkungen: VVIQ = Vividness of Visual Imagery Questionnaire, PSI-Q = Plymouth Sensory Imagery Questionnaire, VVQ = Verbalizer-Visualizer-Questionnaire, SUIS = Spontaneous Use of Imagery Scale, TAS-20 = Toronto Alexithymia Scale. <sup>1</sup> hier die gekürzte Version der Subskala Sonne (2 Items, siehe ESM 1), <sup>2</sup> hier die erweiterte Version der Subskala Landschaft (6 Items, siehe elektronisches Supplement 1). \*\*\*  $p \leq .001$ , \*\*  $p \leq .01$ , \*  $p \leq .05$ .
